# Supplementary material for: Enhancing the tactile and near-infrared sensing capabilities of electrospun PVDF nanofibers with the use of gold nanocages
Source: Royal Society of Chemistry journal article supplement (doi:10.1039/c8tc02671h), 2018-01-01
Supplement: c8tc02671h1.pdf [file c8tc02671h1.pdf]

## Supporting Information

### **Enhancing the Tactile and Near-Infrared Sensing Capabilities of Electrospun PVDF Nanofibers with the Use of Gold Nanocages**

Haoxuan Li,<sup>a,b</sup> Tong Wu,<sup>a</sup> Minghao, Xie,<sup>c</sup> Yifeng Shi,<sup>d</sup> Song Shen<sup>a</sup>, Ming Zhao,<sup>c</sup>  
Xuan Yang,<sup>a</sup> Legna M. Figueroa-Cosme,<sup>c</sup> Qinfei Ke,<sup>b</sup> Younan Xia<sup>\*a,c,d</sup>

*<sup>a</sup>The Wallace H. Coulter Department of Biomedical Engineering, Georgia Institute of  
Technology and Emory University, Atlanta, GA 30332, USA*

*\*E-mail: younan.xia@bme.gatech.edu*

*<sup>b</sup>Key Laboratory of Textile Science and Technology, College of Textiles, Donghua  
University, Shanghai 201620, P. R. China*

*<sup>c</sup>School of Chemistry and Biochemistry, Georgia Institute of Technology, Atlanta, GA  
30332, USA*

*<sup>d</sup>School of Chemical and Biomolecular Engineering, Georgia Institute of Technology,  
Atlanta, GA 30332, USA*

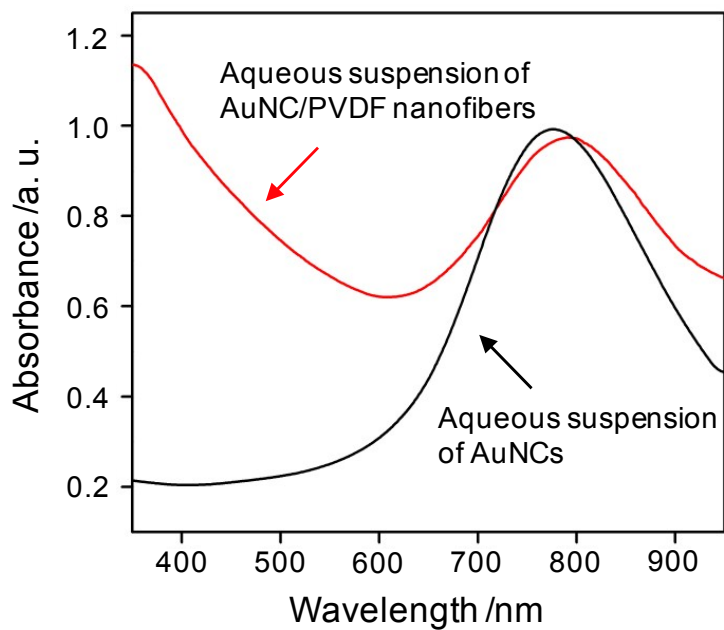

**Fig. S1.** UV-vis-NIR spectra recorded from an aqueous suspension of the AuNCs and AuNC/PVDF nanofibers, respectively. The absorption at wavelengths below 600 nm can be attributed to the PVDF and nanofibers. Note that the spectra were recorded from a new batch of AuNCs slightly different from those used in the experiments described in the main text. The main purpose of this Figure is to illustrate the red shift in LSPR peak position when the medium surrounding AuNCs was switched from water to PVDF.

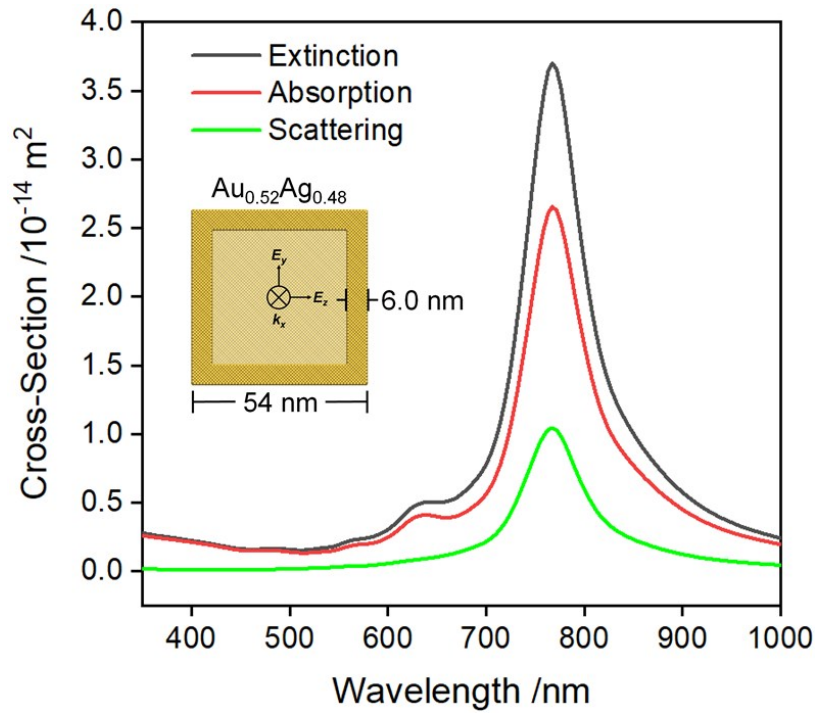

**Fig. S2.** Extinction, absorption, and scattering spectra calculated from one individual AuNC using the discrete dipole approximation (DDA) method. We modeled the nanocage with an atomic composition of 52% Au and 48% Ag based on the ICP-MS data, and assumed that it was surrounded by and completely filled with water. The nanocage was approximated as a nanobox, together with an outer edge length of 54 nm and a wall thickness of 6 nm.
